# Supplementary material for: Acute relaxation during pregnancy leads to a reduction in maternal electrodermal activity and self-reported stress levels
Source: PubMed Central journal article supplement (PMC8447712; doi:10.1186/s12884-021-04099-4), 2021-09-17
Supplement: 12884_2021_4099_MOESM1_ESM.pdf [file 12884_2021_4099_MOESM1_ESM.pdf]

**Acute relaxation during pregnancy leads to a reduction in maternal electrodermal activity and self-reported stress levels**

Ilana Bauer<sup>1</sup>, Julia Hartkopf<sup>1</sup>, Anna-Karin Wikström<sup>2</sup>, Nora K. Schaal<sup>3</sup>, Hubert Preissl<sup>1,6</sup>, Birgit Derntl<sup>4,5</sup>, Franziska Schleger<sup>1</sup>

<sup>1</sup> *Institute for Diabetes Research and Metabolic Diseases of the Helmholtz Center Munich/ fMEG Center; German Center for Diabetes Research (DZD e.V.), University of Tuebingen, Tuebingen, Germany*

<sup>2</sup> *Department of Women's and Children's health, Uppsala University, Sweden*

<sup>3</sup> *Department of Experimental Psychology, Heinrich-Heine-University, Duesseldorf, Germany*

<sup>4</sup> *Department of Psychiatry and Psychotherapy at the University of Tuebingen, Tuebingen, Germany*

<sup>5</sup> *LEAD Graduate School & Research Network, University of Tuebingen, Tuebingen, Germany*

<sup>6</sup> *Department of Internal Medicine IV, Division of Endocrinology, Diabetology, and Nephrology, University Hospital Tuebingen, Tuebingen, Germany*

**Correspondence to:**

**Ilana Bauer**

**fMEG-Center**

**Otfried-Müller-Strasse 47**

**72076 Tuebingen**

**Email: [ilena.bauer@uni-tuebingen.de](mailto:ilena.bauer@uni-tuebingen.de)**

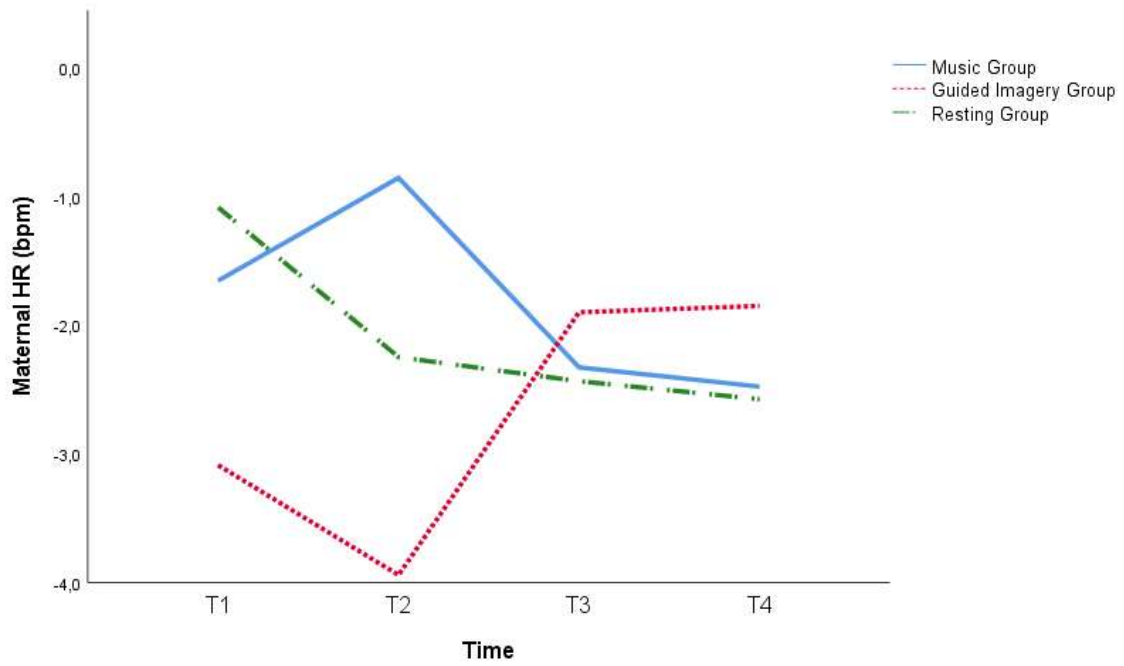

Supplementary Figure 1. Maternal Heart Rate (HR): Overview of maternal HR (bpm) over all time points: Music Group, Guided Imagery Group, Resting Group.

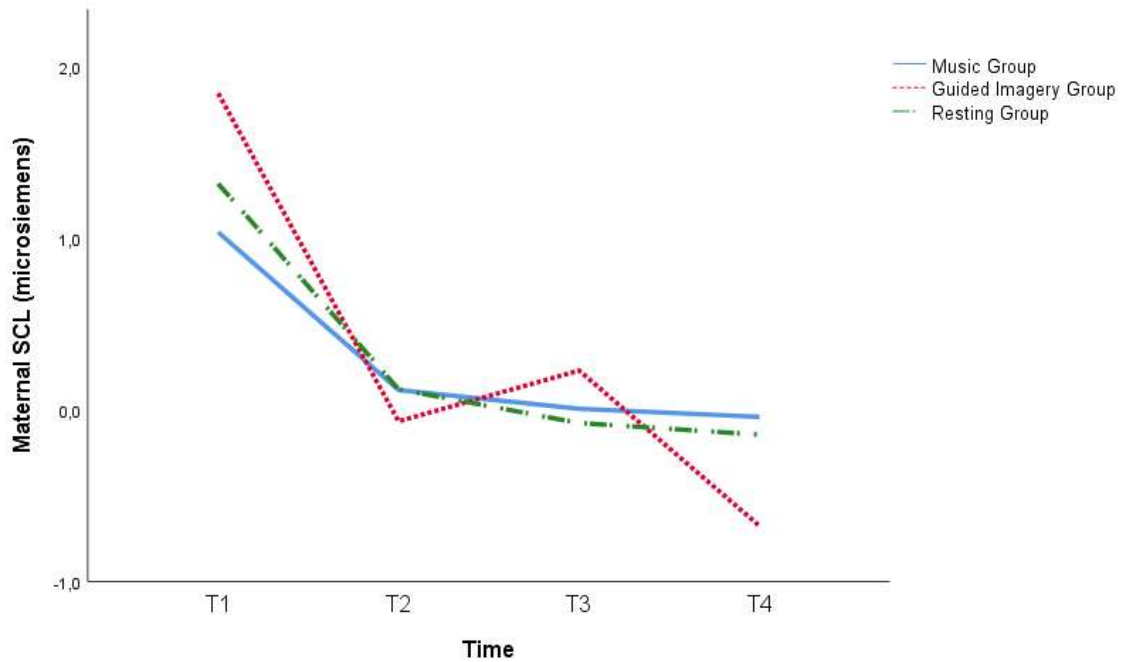

Supplementary Figure 2. Skin conductance level (SCL): Baseline corrected SCL (microsiemens) over all timepoints for the three groups separately.
